# Supplementary material
Source: publisher figshare collection journal article supplement (https://acs.figshare.com/ndownloader/files/14401313)
Supplement: Supplementary file 1 [file 14401313]

*Supporting Information*

# Influence of Surfactant on Crystallization Kinetics of Stearic Acid

*Hiya Goswami and Jyoti R. Seth\**

Department of Chemical Engineering, Indian Institute of Technology Bombay, Powai, Mumbai-  
400076, India.

[\\*jyoti@che.iitb.ac.in](mailto:*jyoti@che.iitb.ac.in), Tel: +91 (22) 2576 7226 Fax: +91 (22) 2572 6895

## SOLUBILITY OF SA IN MO

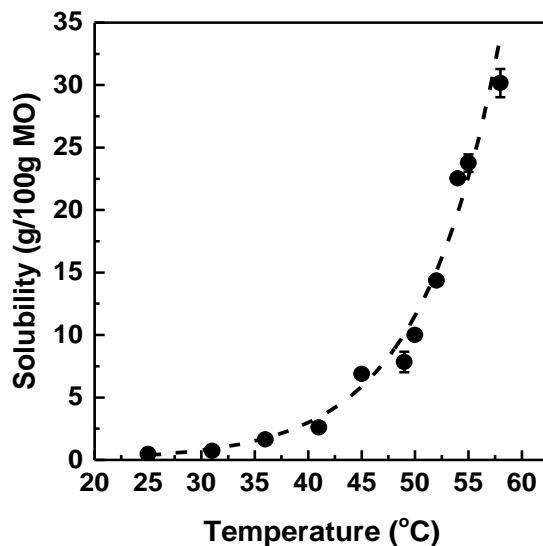

**Figure S1** Solubility of SA in MO as a function of temperature.

At room temperature (25 °C), the solubility of SA in MO is  $C_{SA}^0 = 0.4\%$ . Figure S1 represents the solubility of SA in MO at different temperatures. The solubility of SA in MO at 25 °C was also verified by turbidity measurements.

In the presence of Span 80, the solubility of SA in MO at 25 °C was determined using turbidity measurements. By extrapolating the solubility data for different surfactant concentrations, it was found that there is negligible change in solubility of SA for up to 0.08 wt. % surfactant.

## MORPHOLOGY OF C-FORM CRYSTAL OF SA

For C-form, the crystal is lozenge shaped with an acute angle of  $55^\circ$ . Figure S2 is a schematic of the same. Distance between the two farthest endpoints is termed as the major axis ( $L_1$ ). The distance between the other two endpoints is marked as the minor axis ( $L_2$ ). The estimated ratio of  $L_1$  to  $L_2$  should be 1.96.

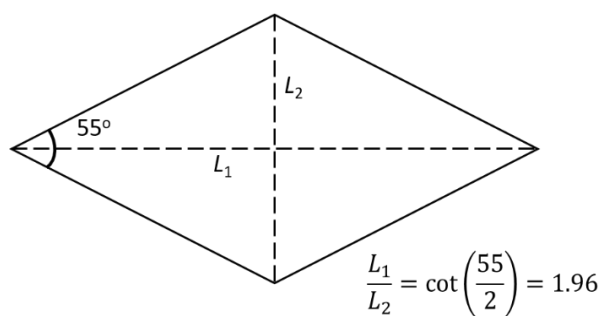

**Figure S2** Schematic of C-form crystal of SA.

## INFLUENCE OF SURFACTANT ON SELECTION OF POLYMORPHS

XRD measurements were performed on a Panalytical, Empyrean powder X-ray diffractometer to determine the polymorphic forms of filtered SA crystals, crystallized with and without surfactant. The diffractometer is equipped with a CuK $\alpha$  source ( $\lambda=1.54$  Å) and was operated to record wide-angle XRD patterns in the  $2\theta$  range from  $5^\circ$  to  $15^\circ$  with a step-size of  $1^\circ/\text{min}$ .

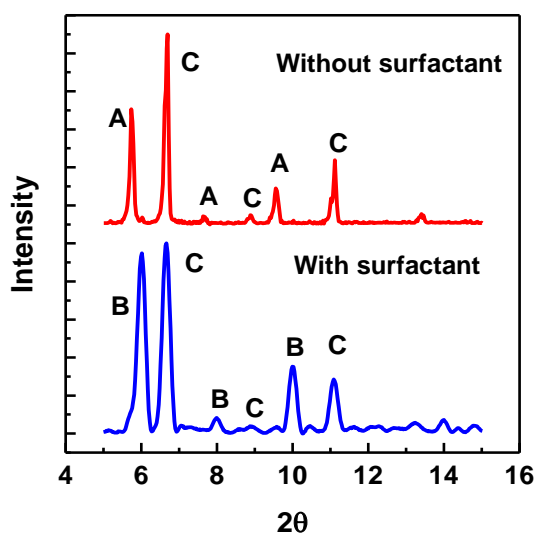

**Figure S3** XRD patterns of SA crystallized without (top) and with (bottom) surfactant in MO. A- and C-forms were observed without surfactant ( $\sigma_0 = 2$ , quiescent cooling) and B- and C-forms were observed with surfactant ( $\sigma_0 = 2$ ,  $C_{\text{surf}} = 0.07\%$ , quiescent cooling). The positions were confirmed by comparison with literature.<sup>25,36</sup>

## REPRESENTATIVE IMAGES AT DIFFERENT SUPERSATURATIONS

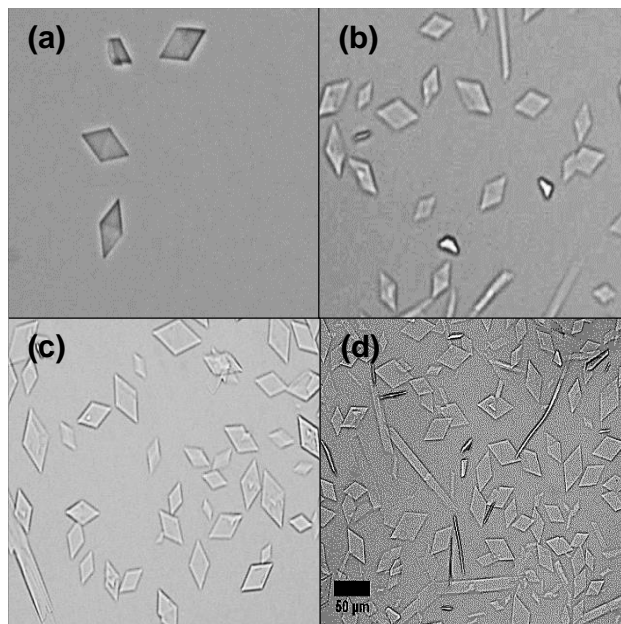

**Figure S4** Bright-field micrographs at different relative supersaturations,  $\sigma_0 =$  (a) 0.5, (b) 1, (c) 1.5 and (d) 2. Increase in number of crystals as a function of relative supersaturation,  $\sigma_0$ , is seen in these images. The optical micrographs were recorded at around 30 min from the time of induction.

## VISCOSITY OF MO WITH DIFFERENT SURFACTANT CONCENTRATIONS

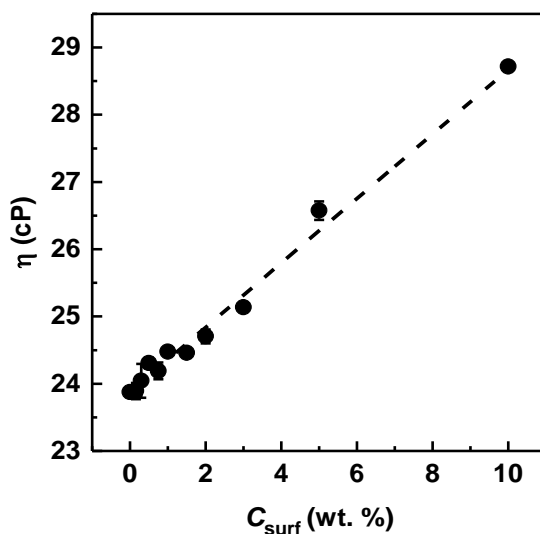

**Figure S5** Plot of viscosity of MO with different surfactant concentrations. The dashed line is a linear fit.

Solutions of Span 80 in MO with concentrations ranging from (0.1-10 wt. %) were made. Viscosity of these solutions was measured in an MCR 301 Anton Paar Rheometer. Viscosity increases linearly with surfactant concentration with no indication of micelle formation.

Further, the same solutions were tested for scattering by DLS (Zetasizer, nano ZS, Malvern). No appreciable scatter was observed. This again confirmed that there was no micellar formation due to Span 80 in MO within the range of concentration of interest.

## REPRESENTATIVE IMAGES AT DIFFERENT SURFACTANT CONCENTRATIONS

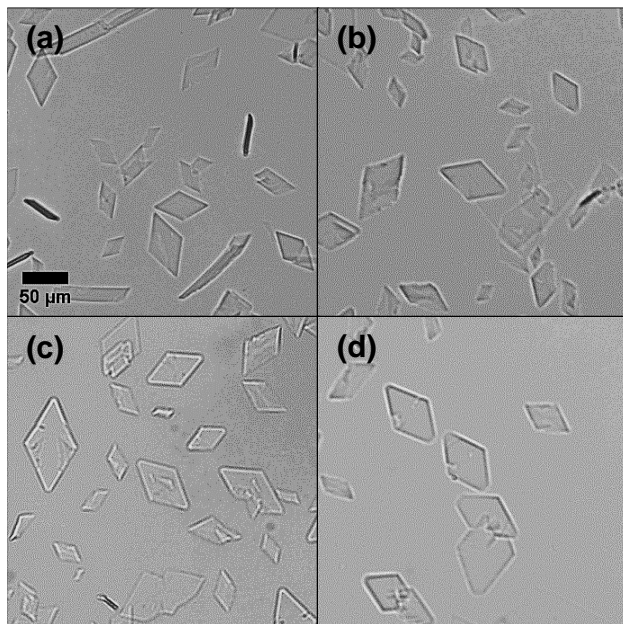

**Figure S6** Bright-field micrographs of SA crystals at relative supersaturation,  $\sigma_0 = 2$ , with varying  $C_{\text{surf}}$  (a) 0.05, (b) 0.06, (c) 0.07 and (d) 0.08%. The optical micrographs were recorded at around 30 min from the time of induction.

Change in crystal morphology with increasing surfactant concentration is represented above. Aspect ratio of the crystals decreased with increasing surfactant concentration.

## THICKNESS OF CRYSTALS CALCULATED FOR DIFFERENT RELATIVE SUPERSATURATIONS AND SURFACTANT CONCENTRATIONS

In these experiments, a 10  $\mu\text{l}$  of solution was added on a glass slide and a coverslip was immediately placed over it. The amount of SA crystallized for this volume was estimated from the solubility data. The solution would spread evenly over the entire coverslip area,  $A = 4.84 \times 10^{-4} \text{ m}^2$ . The fraction of area covered by SA crystals is calculated from the number of crystals and their average size. The density of SA is  $1.018 \text{ g/cm}^3$  and that of MO is  $0.845 \text{ g/cm}^3$  at  $25^\circ\text{C}$ . Thus, the thickness,  $h$  can be calculated as

$$h = \frac{\text{g of SA crystallised in } 10 \mu\text{l solution}}{\text{Density of SA} \times \text{area covered by SA crystals}} \quad (1)$$

**Table S1.** Estimated thicknesses at different relative supersaturations,  $\sigma_0$ .

| Relative supersaturation, $\sigma_0$ | % area covered by crystals of the entire crystallizing area, A | Thickness ( $\mu\text{m}$ ) |
|--------------------------------------|----------------------------------------------------------------|-----------------------------|
| 0.5                                  | 5.0                                                            | 0.7                         |
| 1                                    | 18.0                                                           | 0.4                         |
| 1.5                                  | 40.0                                                           | 0.3                         |
| 2                                    | 70.0                                                           | 0.2                         |
| 2.5                                  | 85.0                                                           | 0.2                         |



**Table S2.** Estimated thicknesses for  $\sigma_0 = 1$  at varying  $C_{\text{surf}}$  (wt. %).

| $C_{\text{surf}}$ (wt. %) | % area covered by crystals of<br>the entire crystallizing area, A | Thickness ( $\mu\text{m}$ ) |
|---------------------------|-------------------------------------------------------------------|-----------------------------|
| 0.03                      | 18.0                                                              | 0.4                         |
| 0.04                      | 16.0                                                              | 0.4                         |
| 0.05                      | 14.0                                                              | 0.5                         |
| 0.06                      | 12.0                                                              | 0.6                         |

**COMPARISON BETWEEN PREDICTED AND FITTED VALUES OF MAXIMUM  
CRYSTAL SIZE AND THE TIME SCALE OF GROWTH FOR DIFFERENT  
RELATIVE SUPERSATURATIONS**

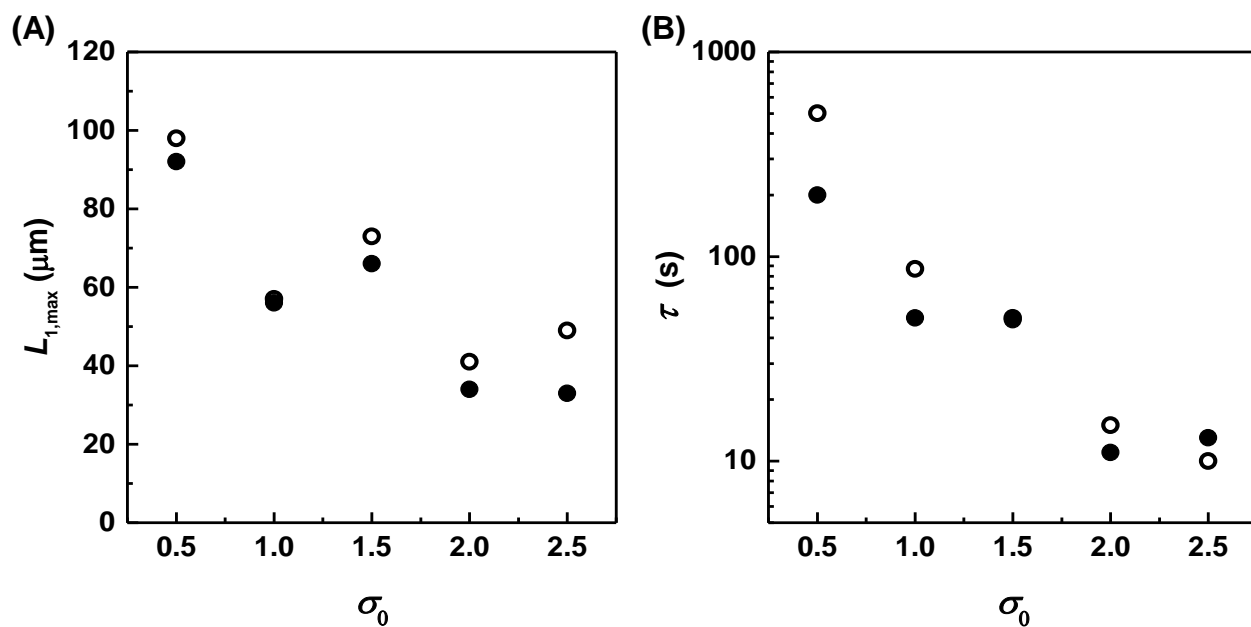

**Figure S7** Predicted (o) and fitted values (●) of (A)  $L_{1,max}$ , and (B)  $\tau$ , for different relative supersaturations,  $\sigma_0$ . The fitted values are obtained by using eq 10 to fit the data for  $L_1$  and  $L_2$  versus time for different supersaturations.

## EFFECT OF SURFACTANT ON GROWTH RATES

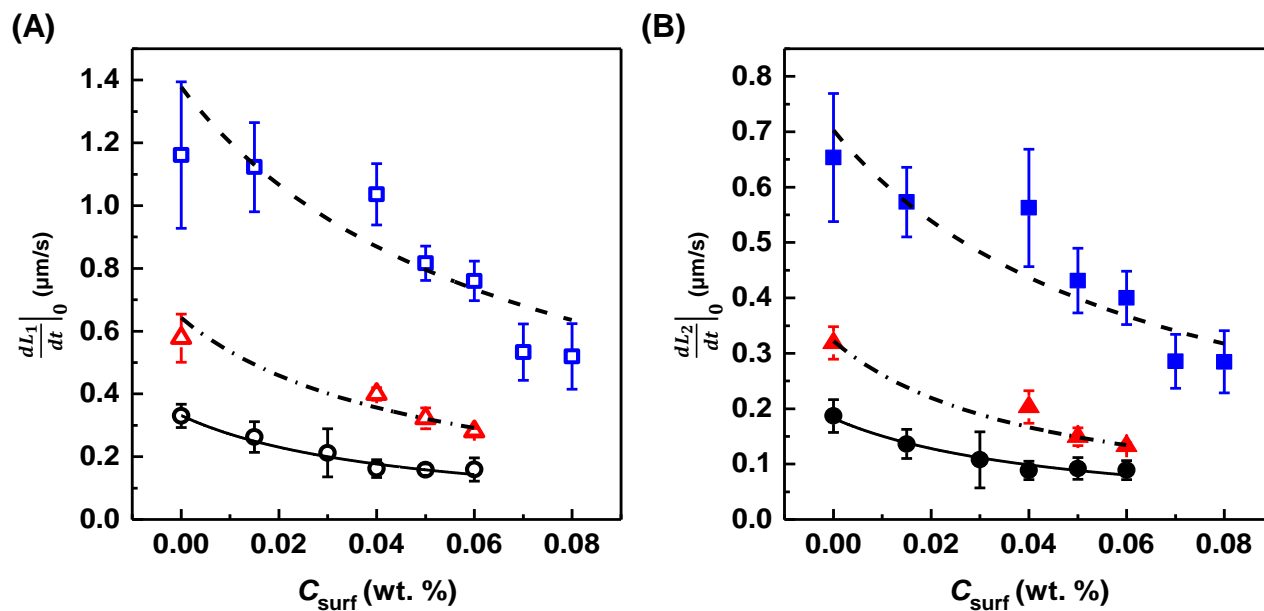

**Figure S8** Initial growth rates for major (open symbols) and minor axes (filled symbols) versus  $C_{\text{surf}}$ . Data for different supersaturations [ $\sigma_0 = 1$  (○,●), 1.5 (△,▲) and 2 (□,■)]. Lines are best fits using eq 7.

## CRYSTAL GROWTH MECHANISM

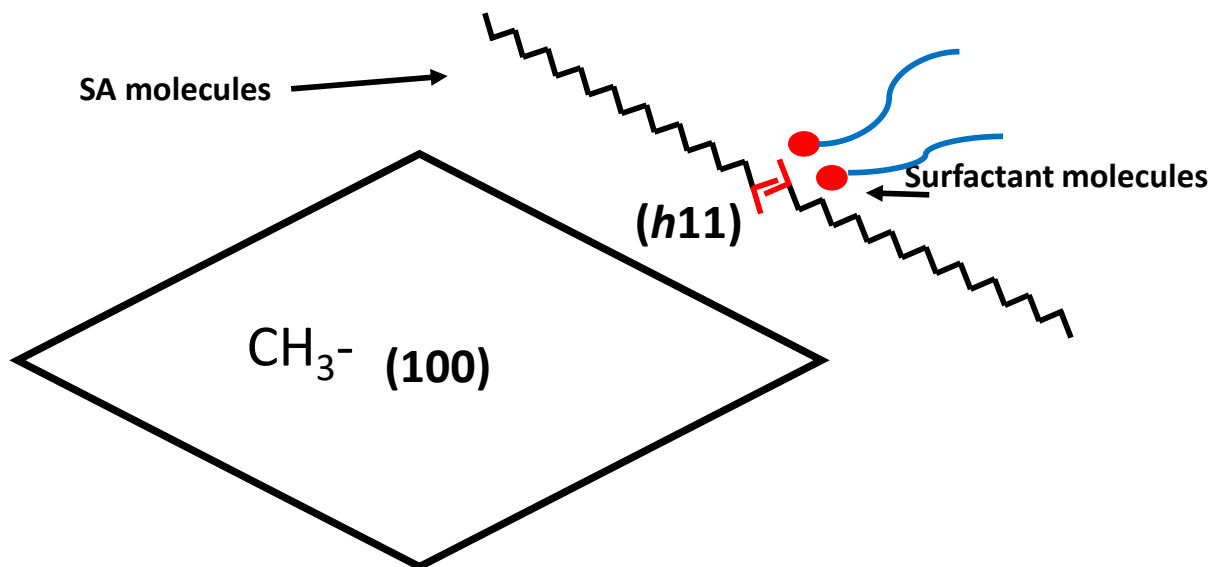

**Figure S9** Schematic of the interaction between SA and Span 80 molecules during crystal growth.

## EVIDENCE OF SECONDARY NUCLEATION

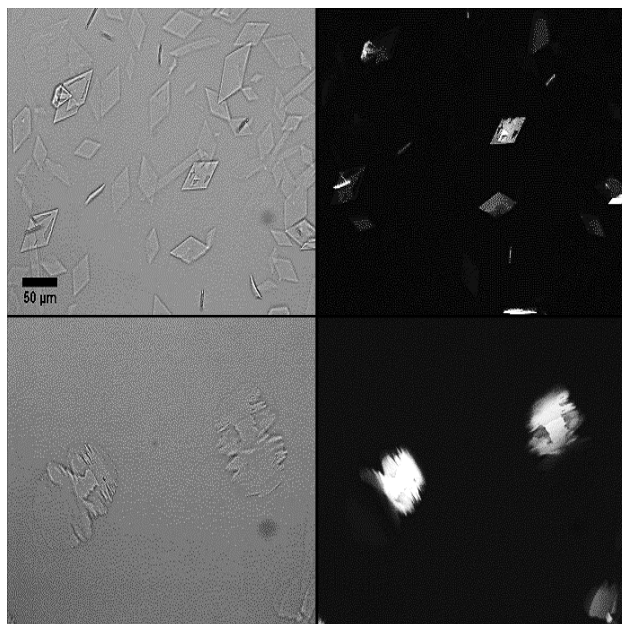

**Figure S10** Bright-field (left) and corresponding cross-polarized light (right) images of SA crystals at  $\sigma_0 = 2$ , without (top) and with 0.08 wt.% surfactant (bottom). Secondary nucleation is seen as the bright surface patches in the cross polarised light images, observed in the presence of surfactant.
